# Erratum: X-ray properties of $z \gtrsim 6.5$ quasars

by E. Pons<sup>1,2</sup>, R. G. McMahon<sup>1,2</sup>, M. Banerji<sup>1,2</sup> and S. L. Reed<sup>3</sup>

<sup>1</sup>*Institute of Astronomy, University of Cambridge, Madingley Road, Cambridge CB3 0HA, UK*

<sup>2</sup>*Kavli Institute for Cosmology, University of Cambridge, Madingley Road, Cambridge CB3 0HA, UK*

<sup>3</sup>*Department of Astrophysical Sciences, Princeton University, 4 Ivy Lane, Princeton, NJ 08544, USA*

**Key words:** errata, addenda – galaxies: active – galaxies: high-redshift – dark ages, reionization, first stars – X-rays: galaxies.

**Table 1.** Corrected values of  $\alpha_{\text{ox}}$  after converting the 2500 Å; flux in the rest-frame.

| Object           | $\alpha_{\text{ox}}$ |
|------------------|----------------------|
| VDES J0020–3653  | $-1.72 \pm 0.14$     |
| VDES J0244–5008  | $-1.55$              |
| VDES J0224–4711  | $-1.61 \pm 0.07$     |
| VIK J0109–3047   | $-1.28$              |
| PSO J338+29      | $-1.54$              |
| PSO J159–02      | $-1.54 \pm 0.06$     |
| VIK J0305–3150   | $-1.56$              |
| PSO J036+03      | $-1.80 \pm 0.13$     |
| CFHQS J0210–0456 | $-1.16$              |

The paper ‘X-ray properties of  $z \gtrsim 6.5$  quasars’ was published in MNRAS, 491, 3884–3890 (2020). After publication of the paper, an error on the computation of the optical to X-ray slope ( $\alpha_{\text{ox}} = 0.3838 \times \log(f_{2\text{ keV}}/f_{2500\text{ Å}})$ ) presented in table 4, right panel of figs 4 and 5 was discovered. The values of  $\alpha_{\text{ox}}$  were underestimated due to the fact that the UV flux  $f_{2500\text{ Å}}$  was not converted to the rest-frame.

This correction do not change the conclusion of the paper but the new values of  $\alpha_{\text{ox}}$  (listed in Table 1) are in better agreement with the known  $\alpha_{\text{ox}} - L_{2500}$  anti-correlation (see Fig. 1), strengthening the conclusion. Also as find before in the original paper we do not observe any obvious evolution of  $\alpha_{\text{ox}}$  with redshift (see Fig. 2; top panel), especially when correcting for the effect of the luminosity (see Fig. 2; bottom panel).

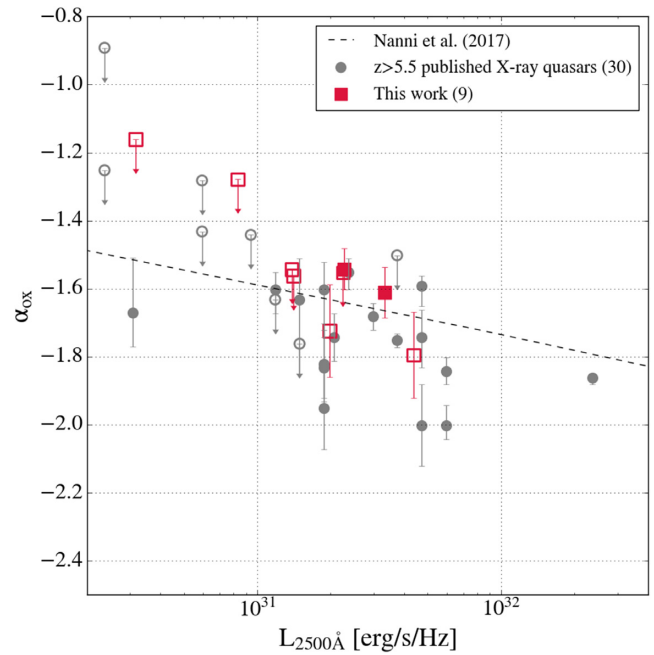

**Figure 1.** Correlation between the optical-to-X-ray slope  $\alpha_{\text{ox}}$  and the luminosity at the rest-frame  $\lambda = 2500\text{ Å}$  ( $L_{2500\text{ Å}}$ ). The dashed line corresponds to the best fit relation from Nanni et al. (2017), and the quasars from this work are completely consistent with this expectation.

\* E-mail: epons@ast.cam.ac.uk (EP); rgm@ast.cam.ac.uk (RGM)

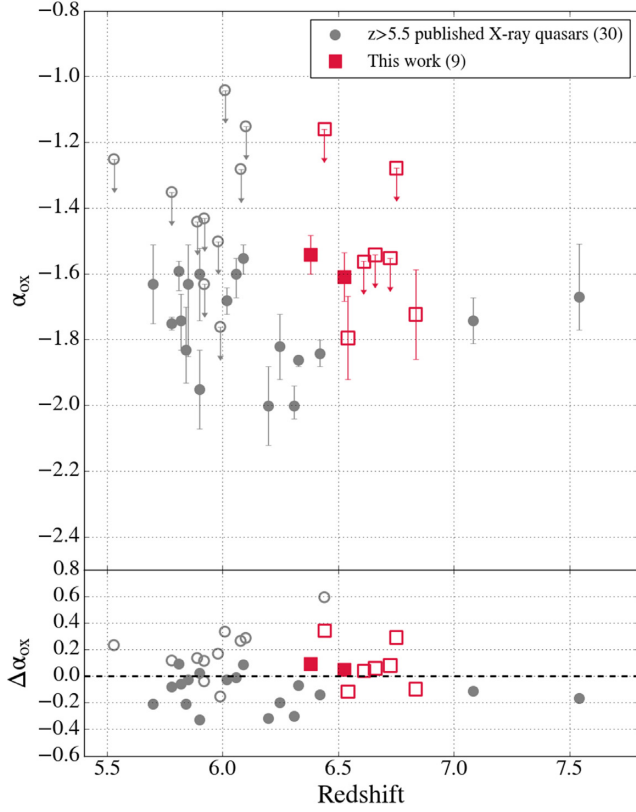

**Figure 2.** Top panel: Optical-to-X-ray slope  $\alpha_{\text{ox}}$  versus redshift. Bottom panel: Difference between the computed  $\alpha_{\text{ox}}$  and the predicted  $\alpha_{\text{ox}}$  from  $L_{2500 \text{ \AA}}$  using the correlation by Nanni et al. (2017) ( $\Delta\alpha_{\text{ox}}$ ). We do not observe obvious correlation between  $\alpha_{\text{ox}}$  and the redshift as stated by previous works.

## ACKNOWLEDGEMENT

We thank Fabio Vito and W. Niel Brandt for pointing out these issues.

## REFERENCE

Nanni R., Vignali C., Gilli R., Moretti A., Brandt W. N., 2017, *A&A*, 603, A128

This paper has been typeset from a  $\text{\LaTeX}$  file prepared by the author.
